# Supplementary material
Source: Springer Nature journal article supplement (https://www.springermedizin.de/resource/supplementary/13058_2005_1343_MOESM3_ESM.pdf/9698902)
Supplement: MOESM3 [file 9698902]

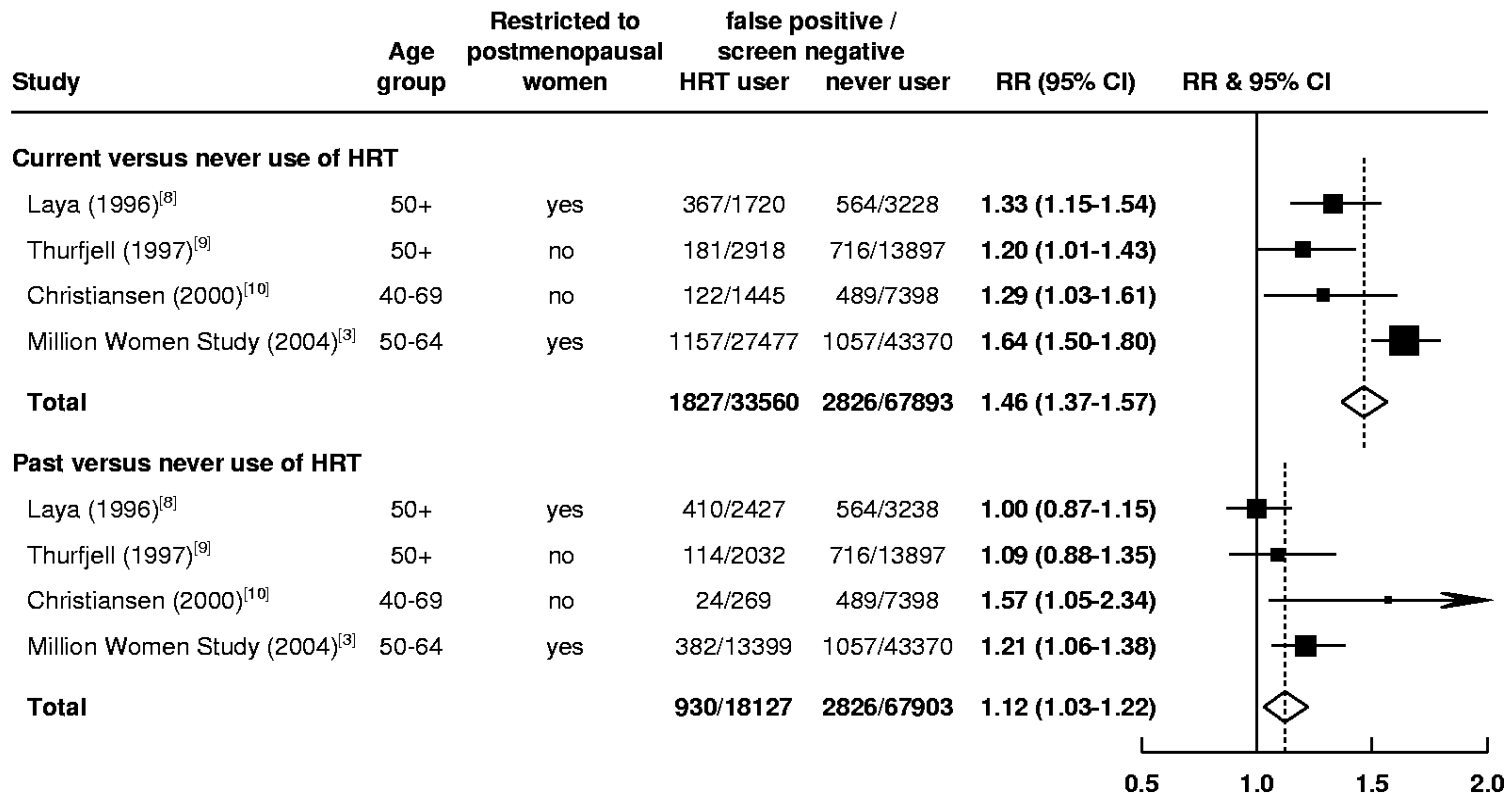

Test for heterogeneity for current use of HRT versus never:  $\chi^2_3 = 13.9$ ;  $P = 0.003$

Test for heterogeneity for past use of HRT versus never:  $\chi^2_3 = 6.8$ ;  $P = 0.08$
